# Supplementary material for: Reserve and Maintenance in the Aging Brain: A Longitudinal Study of Healthy Older Adults
Source: eNeuro. 2022 Feb 2;9(1):ENEURO.0455-21.2022. doi: 10.1523/ENEURO.0455-21.2022 (PMC8856699; doi:10.1523/ENEURO.0455-21.2022)
Supplement: Extended Data Figure 2-3 — Estimated model parameters and their corresponding t values and p-values (corrected for multiple comparisons using FDR) of the optimal LME models for regional GM volume using data from female participants only. Download Figure 2-3, XLS file. [file enu-eN-NWR-0455-21-s04.xls]

## Sheet: Figure 2-3
ROIs	Estimates				T-value				FDR-corrected p-value
Left	Intercept	bAge	bTime	eTIV	Intercept	bAge	bTime	eTIV	Intercept	bAge	bTime	eTIV
bankssts	1652.4	-11.0151	-5.16133	0.000847029	4.24597	-3.44432	-2.44206	4.00529	6.24409e-05	0.00125101	0.0227683	0.000160155
caudalanteriorcingulate	612.387	-6.41729	-13.0933	0.000979707	1.37383	-1.75665	-6.52663	4.0445	0.204809	0.105683	1.13723e-09	0.000138446
caudalmiddlefrontal	2048.14	-11.2791	-30.6386	0.00300358	1.93501	-1.29459	-4.16559	5.22207	0.0721857	0.233964	8.49789e-05	9.40625e-07
cuneus	1768.22	-1.25715	-14.9662	0.00096474	3.12367	-0.26975	-4.71508	3.13623	0.00333444	0.811338	8.93062e-06	0.00323961
entorhinal	1094.92	-4.32187	-1.35025	0.000688069	2.87155	-1.37635	-0.37506	3.32079	0.00700535	0.204772	0.746198	0.00181935
fusiform	5596	-35.8032	-15.6137	0.00402292	5.12036	-3.98426	-1.46364	6.77436	1.46045e-06	0.00017013	0.177211	3.10214e-10
inferiorparietal	4105.79	-39.1215	-48.8697	0.00738662	3.00694	-3.48568	-4.91822	9.95542	0.00476432	0.00108494	3.73512e-06	4.02842e-19
inferiortemporal	4354.36	-30.242	-13.4483	0.00555762	2.81017	-2.37157	-1.01125	6.60066	0.00831298	0.0270928	0.363171	7.39671e-10
isthmuscingulate	179.832	6.43362	-13.7877	0.0013508	0.469023	2.04072	-5.14629	6.48333	0.679233	0.0586832	1.29754e-06	1.35414e-09
lateraloccipital	6535.03	-33.7216	-30.7237	0.00514604	4.64877	-2.91372	-2.27117	6.73683	1.19168e-05	0.00621526	0.0347026	3.60648e-10
lateralorbitofrontal	2590.03	-3.9036	-24.7584	0.00308054	4.36304	-0.79858	-4.40394	9.5499	4.03804e-05	0.471782	3.40405e-05	5.24864e-18
lingual	2821.97	-13.081	-33.2231	0.00293532	2.5392	-1.43151	-6.34499	4.85997	0.0177852	0.186582	2.86927e-09	4.83836e-06
medialorbitofrontal	1973.48	0.740744	-38.0413	0.0020044	3.72115	0.169757	-7.84876	6.95539	0.000470491	0.874927	3.93054e-13	1.04469e-10
middletemporal	6265.84	-43.3035	-8.23409	0.00468718	4.91073	-4.12146	-0.692185	6.76027	3.82998e-06	0.000101417	0.538686	3.29199e-10
parahippocampal	1633.14	-8.67299	-11.0151	0.000612748	4.79403	-3.0919	-4.96609	3.30998	6.41711e-06	0.00365722	3.02663e-06	0.00187646
paracentral	898.336	0.213012	-30.5242	0.00181872	2.21087	0.0639793	-6.87568	8.23781	0.0396364	0.956045	1.68498e-10	3.65588e-14
parsopercularis	1658.05	-5.99862	-18.7067	0.00200665	2.49866	-1.09848	-4.92966	5.56488	0.0198099	0.318199	3.57339e-06	1.87745e-07
parsorbitalis	1022.18	-0.119678	-6.42648	0.000730297	3.27646	-0.0465898	-2.8184	4.30777	0.00206569	0.966414	0.00815471	5.04117e-05
parstriangularis	1607.69	-4.02565	-10.2431	0.00133037	3.05835	-0.930044	-3.34575	4.6572	0.00405737	0.40156	0.00169017	1.15763e-05
pericalcarine	775.05	1.20126	-12.2594	0.000897624	1.48893	0.280539	-3.77678	3.17303	0.171183	0.808932	0.000385403	0.00288238
postcentral	2542.92	-5.58642	-52.9219	0.0052556	1.99179	-0.531623	-5.20584	7.57565	0.0642288	0.642488	1.00868e-06	2.19192e-12
posteriorcingulate	1416.68	-4.94232	-26.6598	0.00128793	3.4136	-1.45156	-10.0216	5.711	0.00135702	0.180493	4.02842e-19	8.90792e-08
precentral	5214.29	3.0871	-68.28	0.00551677	4.30586	0.309856	-4.47721	8.38445	5.04117e-05	0.788708	2.50347e-05	1.4587e-14
precuneus	2083.56	-7.16521	-77.0489	0.00545133	2.0373	-0.853958	-9.44428	9.8093	0.0588612	0.441567	6.39283e-18	8.92352e-19
rostralanteriorcingulate	440.046	-6.81977	-19.0752	0.00168196	0.925765	-1.74496	-7.21159	6.51165	0.4024	0.107833	2.17922e-11	1.21766e-09
rostralmiddlefrontal	1959.69	-11.2594	-61.6866	0.00870763	1.16238	-0.812018	-4.99265	9.5049	0.289297	0.465082	2.68815e-06	5.24864e-18
superiorfrontal	7312.85	-12.1378	-188.528	0.00953837	3.41478	-0.688827	-8.19328	8.19705	0.00135702	0.538827	4.15919e-14	4.15919e-14
superiorparietal	4087.79	-26.1834	-56.6803	0.00735481	2.49051	-1.94328	-4.75312	8.24624	0.020149	0.0711779	7.62487e-06	3.65588e-14
superiortemporal	5452.96	-23.4293	-32.034	0.0054491	4.28032	-2.23453	-3.35952	7.87139	5.5302e-05	0.0377206	0.00162145	3.52007e-13
supramarginal	2859.43	-5.11732	-31.04	0.00565901	1.78329	-0.388305	-3.43113	6.49462	0.100769	0.73871	0.00130226	1.32055e-09
frontalpole	870.282	-2.03872	-8.76653	0.000138296	5.70315	-1.62237	-6.48821	1.66781	9.15211e-08	0.136539	1.34314e-09	0.1262
temporalpole	2023.96	2.61408	2.34266	0.000256752	4.85684	0.761775	0.525074	1.13386	4.85831e-06	0.493789	0.644831	0.30184
transversetemporal	622.411	-0.32252	-8.69962	0.000378727	2.98579	-0.188163	-5.86131	3.3434	0.00506779	0.863532	4.06978e-08	0.00169236
insula	2549.29	4.88174	-28.9483	0.00264493	4.26092	0.991399	-5.44701	8.13558	5.91122e-05	0.371139	3.26457e-07	5.95974e-14
Right
bankssts	1711.5	-11.9705	-11.7738	0.000768497	5.04111	-4.2884	-5.73131	4.16552	2.14191e-06	5.38839e-05	8.09843e-08	8.49789e-05
caudalanteriorcingulate	983.465	-3.65984	-9.72679	0.000751746	2.0915	-0.945939	-5.16508	2.94194	0.052198	0.393922	1.19462e-06	0.00575073
caudalmiddlefrontal	2101.43	-11.0137	-28.6221	0.0027327	2.4019	-1.52978	-4.26076	5.748	0.0251114	0.160026	5.91122e-05	7.51077e-08
cuneus	1516.06	-6.70537	-19.4094	0.00166057	2.72857	-1.46567	-5.43861	5.49968	0.0103287	0.177211	3.36437e-07	2.58053e-07
entorhinal	1265.33	4.81028	-8.57517	0.000127005	3.4005	1.5698	-2.43847	0.628123	0.00141194	0.150315	0.0228651	0.5769
fusiform	7154.49	-41.3074	-29.057	0.00316084	6.38353	-4.47735	-2.77435	5.19011	2.37162e-09	2.50347e-05	0.00921401	1.06552e-06
inferiorparietal	5173.48	-44.6109	-85.4894	0.0081955	3.09806	-3.24519	-7.0822	9.03153	0.00360663	0.00228529	4.91391e-11	1.19574e-16
inferiortemporal	6155.87	-38.6782	-22.8745	0.00466349	4.31335	-3.29146	-1.76655	6.01344	4.9702e-05	0.00198771	0.103964	1.75048e-08
isthmuscingulate	1181.85	-2.22513	-12.6045	0.00091955	2.94028	-0.672522	-5.49176	4.20973	0.00575073	0.547925	2.61342e-07	7.22735e-05
lateraloccipital	5930.51	-35.9103	-58.0591	0.00576541	3.74811	-2.76295	-4.79965	6.70563	0.000427365	0.00942561	6.3153e-06	4.15743e-10
lateralorbitofrontal	2948.91	-5.47809	-12.6527	0.00286444	4.41857	-0.998911	-2.21913	7.89871	3.22079e-05	0.368495	0.0390212	3.05663e-13
lingual	2907.82	-12.8558	-35.1448	0.00331884	2.86566	-1.54066	-5.3824	6.01831	0.00709183	0.157728	4.39453e-07	1.73226e-08
medialorbitofrontal	2651.48	-5.36897	-18.3003	0.00202351	5.35389	-1.31746	-3.63898	7.51947	5.02952e-07	0.225685	0.000638347	3.09186e-12
middletemporal	5990.56	-43.5539	-51.1143	0.0055822	4.53369	-4.003	-4.16859	7.77458	1.97883e-05	0.000160161	8.49789e-05	6.03061e-13
parahippocampal	1914.9	-7.34661	-10.7354	0.000243395	6.7133	-3.13007	-5.49421	1.5703	4.06755e-10	0.00328537	2.61342e-07	0.150315
paracentral	1610.89	-1.22763	-11.056	0.00154153	2.94894	-0.272982	-2.29631	5.19326	0.00566444	0.811338	0.0326874	1.06176e-06
parsopercularis	1555.07	-4.99416	-29.0245	0.00162911	2.47838	-0.969646	-7.79522	4.77793	0.0207207	0.381877	5.45863e-13	6.85311e-06
parsorbitalis	1637.36	-4.20536	-18.01	0.000792239	4.00499	-1.25073	-6.41185	3.5661	0.000160155	0.251423	2.04236e-09	0.000819516
parstriangularis	2242.98	-10.2315	-35.2052	0.00176283	2.75705	-1.52852	-9.51162	3.98749	0.00953913	0.160026	5.24864e-18	0.000169257
pericalcarine	1058.65	-1.4594	-8.12453	0.00106468	1.94615	-0.325871	-2.11559	3.6016	0.071063	0.779041	0.0494729	0.00072345
postcentral	466.996	16.2649	-62.4241	0.00544498	0.346546	1.46962	-5.22923	7.43597	0.765688	0.176808	9.1865e-07	5.05447e-12
posteriorcingulate	941.924	-5.92202	-17.2052	0.00176223	2.16968	-1.65779	-6.37679	7.46995	0.0435034	0.128217	2.42001e-09	4.1663e-12
precentral	4620.13	0.0773863	-90.0293	0.00578677	2.88238	0.0058718	-6.31634	6.64397	0.00681428	0.995318	3.33778e-09	5.94462e-10
precuneus	2565.96	-14.8922	-39.826	0.00560292	2.34067	-1.65225	-4.74289	9.40567	0.0292515	0.129067	7.91873e-06	7.73102e-18
rostralanteriorcingulate	103.857	-4.88384	-6.64855	0.0014183	0.243659	-1.39854	-3.28867	6.12324	0.828937	0.197481	0.00199352	9.63421e-09
rostralmiddlefrontal	2222.46	-4.42335	-86.8702	0.00844858	0.89869	-0.217725	-6.73903	6.28682	0.416795	0.846412	3.60648e-10	3.9019e-09
superiorfrontal	4629.73	-9.23804	-142.58	0.0105058	2.2674	-0.551128	-6.61206	9.46933	0.0348539	0.630494	7.06302e-10	5.981e-18
superiorparietal	3891.16	-17.4758	-65.3479	0.0068187	2.17589	-1.188	-5.39498	7.01682	0.0430577	0.278448	4.17177e-07	7.26334e-11
superiortemporal	4099.75	-19.793	-65.92	0.00587223	3.427	-2.00946	-7.57955	9.0331	0.00131214	0.0625582	2.19192e-12	1.19574e-16
supramarginal	2912.93	-5.9998	-48.5863	0.00491136	2.00132	-0.50072	-5.25281	6.20956	0.0633117	0.660522	8.36087e-07	5.9288e-09
frontalpole	640.258	0.701665	-6.36449	0.000310276	3.6047	0.479898	-3.52102	3.21484	0.000720578	0.673633	0.000960585	0.00251831
temporalpole	1926.55	-2.57712	-6.86107	0.000553228	5.24336	-0.852314	-1.5522	2.77109	8.65944e-07	0.441567	0.154913	0.0092509
transversetemporal	301.528	0.245755	-6.39184	0.00037773	2.00006	0.198527	-5.54094	4.61093	0.0633117	0.858502	2.10215e-07	1.40479e-05
insula	3228.65	6.96971	-40.1185	0.00193597	5.67629	1.49145	-8.21201	6.26384	1.04335e-07	0.171143	4.11526e-14	4.38728e-09
